# Supplementary material for: Characterization and comparative analysis of the complete chloroplast genome sequence from Prunus avium ‘Summit’
Source: PeerJ. 2019 Dec 20;7:e8210. doi: 10.7717/peerj.8210 (PMC6927351; doi:10.7717/peerj.8210)
Supplement: Table S1 [file peerj-07-8210-s001.xlsx]

## Sheet: SweetCherry GOAn
rpoC1	GO:0009507,GO:0042644,GO:0003899,GO:0003677,GO:0006351
ycf4	GO:0009522,GO:0016021,GO:0015979,GO:0009535
ccsA	GO:0020037,GO:0016021,GO:0017004,GO:0015886,GO:0009535
ndhE	GO:0019684,GO:0030964,GO:0042773,GO:0016021,GO:0048038,GO:0045272,GO:0008137,GO:0016655,GO:0009535
rps16	GO:0005840,GO:0009507,GO:0003735,GO:0006412
ndhD	GO:0005747,GO:0009060,GO:0042773,GO:0016021,GO:0048038,GO:0015990,GO:0048039,GO:0008137,GO:0009535
ndhC	GO:0009507,GO:0019684,GO:0030964,GO:0016021,GO:0048038,GO:0008137,GO:0009535
rps15	GO:0005840,GO:0009507,GO:0003735,GO:0006412
rps14	GO:0005840,GO:0019843,GO:0009507,GO:0003735,GO:0006412
ndhB	GO:0019684,GO:0042773,GO:0016021,GO:0048038,GO:0008137,GO:0009535
ndhI	GO:0005506,GO:0051539,GO:0019684,GO:0048038,GO:0008137,GO:0009535
ndhH	GO:0009570,GO:0019684,GO:0048038,GO:0051287,GO:0016655,GO:0009535
ndhG	GO:0016021,GO:0048038,GO:0008137,GO:0009535
rps18	GO:0005840,GO:0009570,GO:0009507,GO:0005763,GO:0019843,GO:0070181,GO:0009941,GO:0003735,GO:0006412
clpP	GO:0004176,GO:0009570,GO:0006515,GO:0009368,GO:0004252,GO:0051117
ndhF	GO:0042773,GO:0016021,GO:0048038,GO:0008137,GO:0009535
ndhK	GO:0005506,GO:0051539,GO:0019684,GO:0009060,GO:0048038,GO:0015990,GO:0045272,GO:0008137,GO:0009535
ndhJ	GO:0009970,GO:0019684,GO:0048038,GO:0008137,GO:0009535
rpl36	GO:0005840,GO:0009570,GO:0009507,GO:0009941,GO:0003735,GO:0006412
rps12	GO:0009570,GO:0019843,GO:0009507,GO:0046677,GO:0003735,GO:0006412,GO:0009534,GO:0015935
ycf1	GO:0016021,GO:0015031,GO:0009706
rps11	GO:0005840,GO:0019843,GO:0009507,GO:0005763,GO:0070181,GO:0003735,GO:0048027,GO:0006412,GO:0000028,GO:0000462
ycf2	GO:0009570,GO:0005524,GO:0009575
ycf3	GO:0048564,GO:0042170,GO:0015979,GO:0042651,GO:0009535
petD	GO:0009507,GO:0045156,GO:0016021,GO:0045158,GO:0009767,GO:0009579,GO:0009534,GO:0009535
rpl2	GO:0005762,GO:0019843,GO:0009507,GO:0016740,GO:0003735,GO:0006412,GO:0015934,GO:0032543
rpl33	GO:0005840,GO:0009507,GO:0003735,GO:0006412
petA	GO:0031361,GO:0005506,GO:0009507,GO:0020037,GO:0015979,GO:0009055,GO:0009535
petB	GO:0009507,GO:0016020,GO:0016021,GO:0045158,GO:0046872,GO:0022904,GO:0015979,GO:0009579,GO:0009534,GO:0009535
rpl32	GO:0009507,GO:0003735,GO:0006412,GO:0015934
petL	GO:0016021,GO:0045158,GO:0009512,GO:0015979,GO:0009535
petN	GO:0016021,GO:0045158,GO:0009512,GO:0042170,GO:0015979,GO:0042651,GO:0017004,GO:0009535
petG	GO:0016021,GO:0045158,GO:0009512,GO:0015979,GO:0017004,GO:0009535
ndhA	GO:0019684,GO:0009060,GO:0016021,GO:0048038,GO:0016655,GO:0009535
psbT	GO:0009539,GO:0016021,GO:0015979,GO:0009535
rpoB	GO:0005665,GO:0009506,GO:0009507,GO:0032549,GO:0005829,GO:0003899,GO:0035196,GO:0003677,GO:0006351
rpoA	GO:0009507,GO:0042644,GO:0046983,GO:0005737,GO:0003899,GO:0003677,GO:0009534,GO:0006351
rbcL	GO:0004497,GO:0009507,GO:0019253,GO:0016984,GO:0009853,GO:0000287
accD	GO:2001295,GO:0009570,GO:0005524,GO:0003989,GO:0009317,GO:0016743,GO:0009575,GO:0006633,GO:0008270
psbZ	GO:0009539,GO:0042549,GO:0016021,GO:0015979,GO:0009535
psbC	GO:0009523,GO:0045156,GO:0016021,GO:0016168,GO:0046872,GO:0018298,GO:0009772,GO:0009535
psbD	GO:0030096,GO:0005506,GO:0009523,GO:0045156,GO:0016021,GO:0016168,GO:0018298,GO:0009772,GO:0009535,GO:0010287
psbE	GO:0005506,GO:0009539,GO:0020037,GO:0016021,GO:0009767,GO:0009055,GO:0009535
psbF	GO:0005506,GO:0009539,GO:0009507,GO:0020037,GO:0016021,GO:0009767,GO:0009055,GO:0009535
rpl22	GO:0009570,GO:0019843,GO:0009507,GO:0009941,GO:0003735,GO:0006412,GO:0015934,GO:0042255
rpl23	GO:0005840,GO:0022625,GO:0009570,GO:0019843,GO:0009507,GO:0009941,GO:0003735,GO:0000027,GO:0006412
psbA	GO:0005506,GO:0009635,GO:0009507,GO:0045156,GO:0016168,GO:0016682,GO:0009579,GO:0009772,GO:0010287,GO:0009523,GO:0016020,GO:0016021,GO:0018298,GO:0009534,GO:0009535
rpl20	GO:0005840,GO:0019843,GO:0009507,GO:0003735,GO:0000027,GO:0006412
rps8	GO:0005840,GO:0019843,GO:0009507,GO:0022627,GO:0003735,GO:0006412
psbB	GO:0009523,GO:0045156,GO:0016021,GO:0016168,GO:0018298,GO:0009772,GO:0009535,GO:0010207,GO:0010287
rps7	GO:0003729,GO:0019843,GO:0009507,GO:0016020,GO:0003735,GO:0009579,GO:0006412,GO:0000028,GO:0015935
matK	GO:0008033,GO:0009507,GO:0003723,GO:0008380,GO:0006397
psbK	GO:0009539,GO:0016021,GO:0015979,GO:0009535
psbL	GO:0009539,GO:0016021,GO:0015979,GO:0009579,GO:0009534,GO:0009535
psbM	GO:0009523,GO:0019684,GO:0016021,GO:0009535
psbN	GO:0009539,GO:0016021,GO:0015979,GO:0009535
psbH	GO:0009523,GO:0050821,GO:0016021,GO:0015979,GO:0042301,GO:0009535
psbI	GO:0009539,GO:0016021,GO:0015979,GO:0009535
psbJ	GO:0009539,GO:0016021,GO:0015979,GO:0009535
atpI	GO:0015986,GO:0046933,GO:0016021,GO:0042777,GO:0005886,GO:0009535,GO:0045263
atpF	GO:0015986,GO:0005524,GO:0046933,GO:0016021,GO:0009535,GO:0045263
atpE	GO:0015986,GO:0009507,GO:0005524,GO:0046933,GO:0009941,GO:0009579,GO:0045261,GO:0009534,GO:0009535
atpH	GO:0008289,GO:0015986,GO:0046933,GO:0016021,GO:0015991,GO:0042170,GO:0005886,GO:0009535,GO:0045263
rps2	GO:0009507,GO:0005763,GO:0003735,GO:0006412,GO:0015935
atpB	GO:0015986,GO:0005524,GO:0046933,GO:0045261,GO:0009535
atpA	GO:0009409,GO:0015986,GO:0005524,GO:0046933,GO:0042742,GO:0031977,GO:0005739,GO:0045261,GO:0008270,GO:0009535,GO:0010287,GO:0010319
rpl16	GO:0005840,GO:0005762,GO:0019843,GO:0009507,GO:0003735,GO:0006412,GO:0032543
rps4	GO:0019843,GO:0009507,GO:0003735,GO:0006412,GO:0015935,GO:0045903
rpl14	GO:0005762,GO:0019843,GO:0009507,GO:0070180,GO:0003735,GO:0006412,GO:0015934
rps3	GO:0009570,GO:0019843,GO:0009507,GO:0022627,GO:0042644,GO:0016020,GO:0009941,GO:0003735,GO:0006412,GO:0015935
psaB	GO:0009522,GO:0051539,GO:0016021,GO:0016168,GO:0018298,GO:0015979,GO:0009055,GO:0000287,GO:0009535
psaC	GO:0009522,GO:0051539,GO:0009507,GO:0016020,GO:0046872,GO:0015979,GO:0009773,GO:0009533,GO:0009534,GO:0009055,GO:0009535
psaA	GO:0009507,GO:0016168,GO:0015979,GO:0009579,GO:0010287,GO:0009522,GO:0051539,GO:0016020,GO:0016021,GO:0009941,GO:0018298,GO:0009534,GO:0009055,GO:0000287,GO:0009535
cemA	GO:0016021,GO:0015078,GO:0009706
psaJ	GO:0009522,GO:0016021,GO:0015979,GO:0009535
rpoC2	GO:0009507,GO:0042644,GO:0003899,GO:0003677,GO:0006351
psaI	GO:0009536,GO:0009522,GO:0016021,GO:0015979,GO:0009535
