# Supplementary material for: Characterization and comparative analysis of the complete chloroplast genome sequence from Prunus avium ‘Summit’
Source: PeerJ. 2019 Dec 20;7:e8210. doi: 10.7717/peerj.8210 (PMC6927351; doi:10.7717/peerj.8210)
Supplement: Table S2 [file peerj-07-8210-s002.xlsx]

## Sheet: sweet_Cherry_CPcds_GO
GOid	Description	Class	Counts	TotalGOid	TotalGeneAnnotated
GO:0046034	ATP metabolic process	biological_process	10	536	77
GO:0009058	biosynthetic process	biological_process	32	536	77
GO:0009056	catabolic process	biological_process	1	536	77
GO:0007154	cell communication	biological_process	1	536	77
GO:0044085	cellular component biogenesis	biological_process	10	536	77
GO:0016043	cellular component organization	biological_process	10	536	77
GO:0044237	cellular metabolic process	biological_process	72	536	77
GO:0051716	cellular response to stimulus	biological_process	1	536	77
GO:0051234	establishment of localization	biological_process	10	536	77
GO:0033036	macromolecule localization	biological_process	1	536	77
GO:0006807	nitrogen compound metabolic process	biological_process	39	536	77
GO:0071704	organic substance metabolic process	biological_process	40	536	77
GO:0055114	oxidation-reduction process	biological_process	15	536	77
GO:0044238	primary metabolic process	biological_process	40	536	77
GO:0050789	regulation of biological process	biological_process	3	536	77
GO:0065008	regulation of biological quality	biological_process	2	536	77
GO:0009628	response to abiotic stimulus	biological_process	1	536	77
GO:0009607	response to biotic stimulus	biological_process	1	536	77
GO:0042221	response to chemical	biological_process	2	536	77
GO:0009605	response to external stimulus	biological_process	2	536	77
GO:0006950	response to stress	biological_process	3	536	77
GO:0044281	small molecule metabolic process	biological_process	7	536	77
GO:1902494	catalytic complex	cellular_component	6	536	77
GO:0071944	cell periphery	cellular_component	5	536	77
GO:0005911	cell-cell junction	cellular_component	1	536	77
GO:0070069	cytochrome complex	cellular_component	3	536	77
GO:0031975	envelope	cellular_component	14	536	77
GO:0005622	intracellular	cellular_component	77	536	77
GO:0044424	intracellular part	cellular_component	77	536	77
GO:0031224	intrinsic component of membrane	cellular_component	39	536	77
GO:0098796	membrane protein complex	cellular_component	31	536	77
GO:0043227	membrane-bounded organelle	cellular_component	77	536	77
GO:0043228	non-membrane-bounded organelle	cellular_component	24	536	77
GO:0043233	organelle lumen	cellular_component	7	536	77
GO:0031090	organelle membrane	cellular_component	6	536	77
GO:0005886	plasma membrane	cellular_component	5	536	77
GO:0044459	plasma membrane part	cellular_component	3	536	77
GO:0070469	respirasome	cellular_component	3	536	77
GO:1990904	ribonucleoprotein complex	cellular_component	20	536	77
GO:0097367	carbohydrate derivative binding	molecular_function	7	536	77
GO:0140098	catalytic activity, acting on RNA	molecular_function	4	536	77
GO:0140096	catalytic activity, acting on a protein	molecular_function	1	536	77
GO:0048037	cofactor binding	molecular_function	22	536	77
GO:0008144	drug binding	molecular_function	6	536	77
GO:1901363	heterocyclic compound binding	molecular_function	36	536	77
GO:0016787	hydrolase activity	molecular_function	1	536	77
GO:0043167	ion binding	molecular_function	21	536	77
GO:0016874	ligase activity	molecular_function	1	536	77
GO:0008289	lipid binding	molecular_function	1	536	77
GO:0016829	lyase activity	molecular_function	1	536	77
GO:0051540	metal cluster binding	molecular_function	5	536	77
GO:0097159	organic cyclic compound binding	molecular_function	36	536	77
GO:0016491	oxidoreductase activity	molecular_function	27	536	77
GO:0005515	protein binding	molecular_function	2	536	77
GO:0036094	small molecule binding	molecular_function	8	536	77
GO:0003735	structural constituent of ribosome	molecular_function	20	536	77
GO:0016740	transferase activity	molecular_function	6	536	77
GO:0022857	transmembrane transporter activity	molecular_function	7	536	77
